# Supplementary material
Source: Springer Nature journal article supplement (https://www.springermedizin.de/resource/supplementary/12881_2010_664_MOESM3_ESM.pdf/9450844)

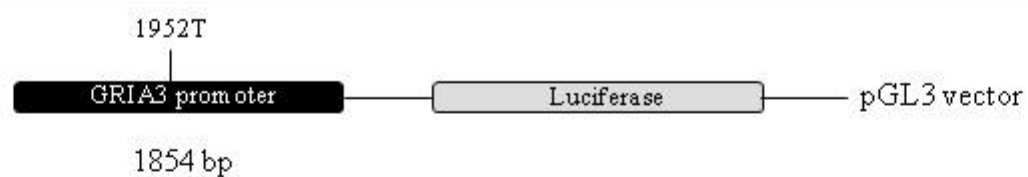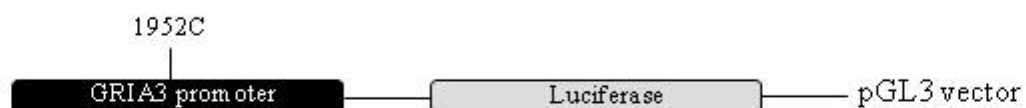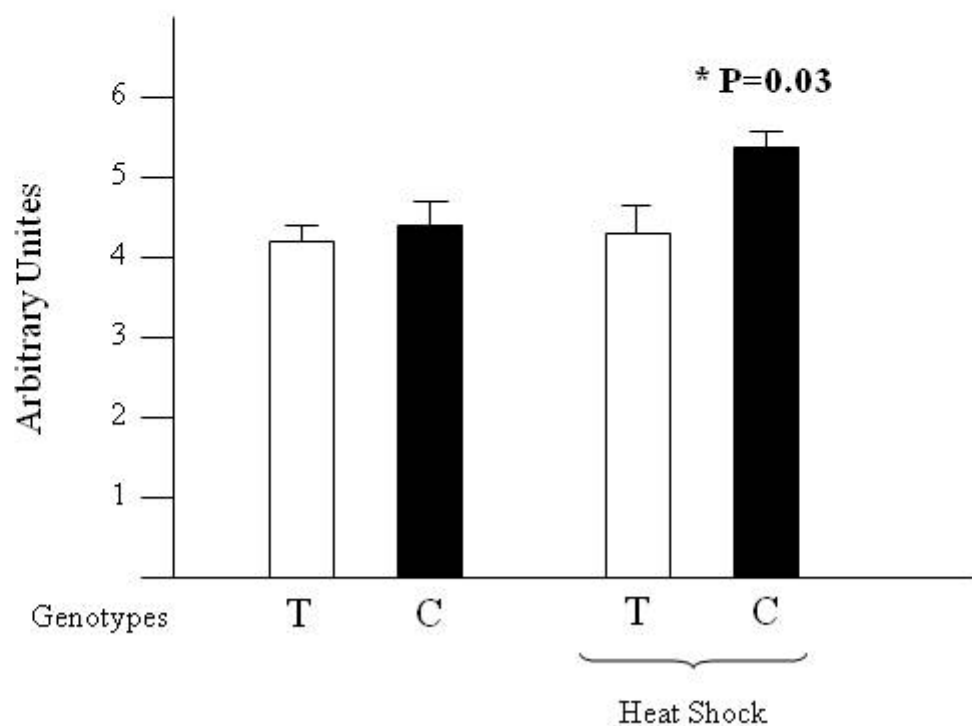

Supplement: MOESM3 [file 9450844]
